# Supplementary material
Source: PubMed Central journal article supplement (PMC3669547)
Supplement: NIHMS469549-supplement-02.pdf [file NIHMS469549-supplement-02.pdf]

**Supplemental Figure 1. Smad2/3 expression plasmid activity on the activin-responsive 3TP-luc luciferase reporter in primary rat GCs.** GCs were transfected with Smad2 or 3 and the 3TP-luc reporter plasmid and treated with or without 100 ng/ml activin A. Differences in activity were evaluated by a two-way ANOVA followed by Tukey's posthoc analysis. Different letters indicate a significant difference ( $p < 0.05$ ) between expression plasmids within each treatment. \* indicates a significant ( $p < 0.05$ ) effect of activin treatment compared with untreated cells within each transfection condition. Values shown are mean  $\pm$  SEM. N = 2.

**Supplemental Figure 2. Effect of FOXL2 over-expression or siRNA knockdown on FOXL2 mRNA and protein levels in primary rat GCs.** **A**, FOXL2 mRNA expression in primary rat GCs transfected with empty vector or FOXL2<sup>wt</sup> or FOXL2<sup>C134W</sup>. FOXL2 mRNA levels were measured by quantitative real-time PCR and normalized to L19 mRNA levels. **B**, FOXL2, Flag and control  $\beta$ -actin protein expression in primary rat GCs transfected with empty vector (1) or FOXL2<sup>wt</sup> (2) or FOXL2<sup>C134W</sup> (3).
