# Supplementary material
Source: PubMed Central journal article supplement (PMC3669547)

Suppl Figure 1

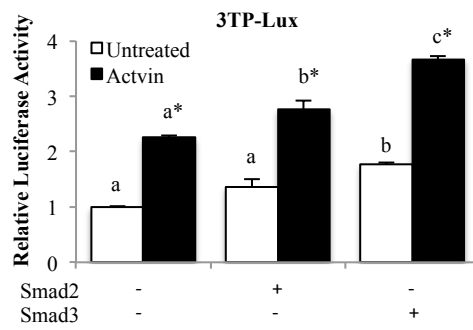

Suppl Figure 2

**A**

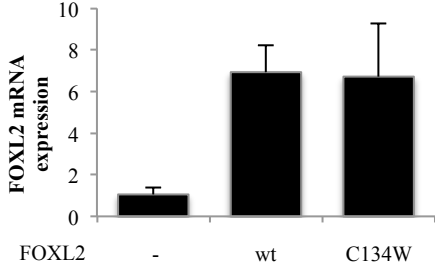

**B**

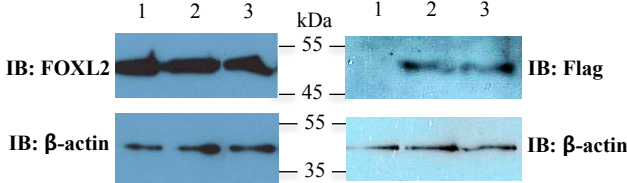

Supplement: NIHMS469549-supplement-01.pdf [file NIHMS469549-supplement-01.pdf]
